# Supplementary material for: Development Features of Ixodes ricinus × I. persulcatus Hybrids under Laboratory Conditions
Source: MDPI journal article supplement (doi:10.3390/microorganisms11092252), 2023-09-07
Supplement: s1 [file s1]

**Table S1.** Duration of feeding, oviposition and hatching of the larvae of *Ixodes ricinus*, *Ixodes persulcatus*, and hybrid females after mating with the males of various species

| Species of female                                | Species of male                                  | Feeding in March, April |                                |                                |                                   | Feeding in June, July             |                                |                                  |                                   | Feeding in September, October     |                           |                                 |                                   |
|--------------------------------------------------|--------------------------------------------------|-------------------------|--------------------------------|--------------------------------|-----------------------------------|-----------------------------------|--------------------------------|----------------------------------|-----------------------------------|-----------------------------------|---------------------------|---------------------------------|-----------------------------------|
|                                                  |                                                  | Weight of female, mg    | Duration of feeding, days      | Days from engorgement till Ov  | Days from Ov till the start of LL | Weight of female, mg              | Duration of feeding, days      | Days from engorgement till Ov    | Days from Ov till the start of LL | Weight of female, mg              | Duration of feeding, days | Days from engorgement till Ov   | Days from Ov till the start of LL |
| <i>I.pers</i>                                    | <i>I.pers</i>                                    | 348.2±82.0<br>(n=10)    | 7.9±0.7<br>(n=17)              | 7.8±1.6 <sup>b</sup><br>(n=12) | 34.8±2.2<br>(n=11)                | 293.7±59.2 <sup>a</sup><br>(n=7)  | 8.5±1.2<br>(n=15)              | 5.3±1.3 <sup>b</sup><br>(n=13)   | 35.4±8.1<br>(n=10)                | 361.4±61.9 <sup>a</sup><br>(n=11) | 8.4±1.4<br>(n=11)         | 6.9±1.1<br>(n=11)               | 37.7±5.9<br>(n=11)                |
| <i>I.pers</i>                                    | <i>I.ric</i>                                     | 312.2±60.3<br>(n=9)     | 8.0±0.9 <sup>i</sup><br>(n=13) | 9.2±2.3 <sup>g</sup><br>(n=11) | 41.5±5.0 <sup>k</sup><br>(n=11)   | 346.4±45.4<br>(n=9)               | 8.9±0.3 <sup>i</sup><br>(n=10) | 5.4±1.2 <sup>g</sup><br>(n=10)   | 40.9±5.5 <sup>l</sup><br>(n=9)    | 380.5±61.5<br>(n=4)               | 9.0±1.7<br>(n=4)          | 7<br>(n=4)                      | 57.0±2.8 <sup>k,l</sup><br>(n=2)  |
| <i>I.pers</i>                                    | Hybrid<br>(♀ <i>I.pers</i><br>×♂ <i>I.ric</i> )  | -                       | -                              | -                              | -                                 | -                                 | -                              | -                                | -                                 | 267.0±236.2<br>(n=2)              | 11.5±2.1<br>(n=2)         | 6<br>(n=1)                      | 47<br>(n=1)                       |
| <i>I.ric</i>                                     | <i>I.ric</i>                                     | 284.3±46.8<br>(n=6)     | 7.4±0.7 <sup>d</sup><br>(n=16) | 9.7±2.2 <sup>e</sup><br>(n=15) | 36.8±2.4 <sup>j</sup><br>(n=15)   | 219.1±74.5 <sup>c</sup><br>(n=13) | 9.4±1.8 <sup>d</sup><br>(n=19) | 7.2±2.0 <sup>e,f</sup><br>(n=17) | 34.9±6.7 <sup>h</sup><br>(n=17)   | 355.8±93.9 <sup>c</sup><br>(n=12) | 9.0±2.5<br>(n=12)         | 10.3±2.5 <sup>f</sup><br>(n=11) | 45.9±2.4 <sup>j,h</sup><br>(n=11) |
| <i>I.ric</i>                                     | <i>I.pers</i>                                    | 287.8±54.7<br>(n=11)    | 7.7±1.6 <sup>m</sup><br>(n=20) | 12.2±2.5<br>(n=20)             | 38.4±36<br>(n=19)                 | 258.5±63.5<br>(n=13)              | 9.5±1.2 <sup>m</sup><br>(n=13) | 10.6±2.8<br>(n=8)                | 38.6±4.9<br>(n=5)                 | -                                 | -                         | -                               | -                                 |
| <i>I.ric</i>                                     | Hybrid<br>(♀ <i>I.pers</i><br>×♂ <i>I.ric</i> )  | -                       | -                              | -                              | -                                 | -                                 | -                              | -                                | -                                 | 217.0±74.6<br>(n=4)               | 11.3±2.4<br>(n=4)         | 8.0±0.8<br>(n=4)                | 56.0±1.4<br>(n=2)                 |
| Hybrid<br>(♀ <i>I.pers</i><br>×♂ <i>I.ric</i> )  | <i>I.ric</i>                                     | 340±17.4<br>(n=3)       | 7.7±0.6<br>(n=3)               | 12.5±9.2<br>(n=2)              | -                                 | -                                 | -                              | -                                | -                                 | -                                 | -                         | -                               | -                                 |
| Hybrid<br>(♀ <i>I.pers</i><br>×♂ <i>I.ric</i> )  | Hybrid<br>(♀ <i>I.pers</i><br>×♂ <i>I.ric</i> )  | 153.3±110.8<br>(n=6)    | 14.3±3.1<br>(n=6)              | 10.0±1.4<br>(n=2)              | -                                 | -                                 | -                              | -                                | -                                 | 172.3±75.8<br>(n=7)               | 12.9±3.9<br>(n=7)         | 9.4±4.1<br>(n=7)                | 55.0±7.1<br>(n=2)                 |
| Hybrid<br>(♀ <i>I.ric</i> ×<br>♂ <i>I.pers</i> ) | <i>I.pers</i>                                    | -                       | -                              | -                              | -                                 | -                                 | -                              | -                                | -                                 | 76.5±68.6<br>(n=2)                | 12<br>(n=2)               | -                               | -                                 |
| Hybrid<br>(♀ <i>I.ric</i> ×<br>♂ <i>I.pers</i> ) | Hybrid<br>(♀ <i>I.ric</i> ×<br>♂ <i>I.pers</i> ) | -                       | -                              | -                              | -                                 | -                                 | -                              | -                                | -                                 | 35<br>(n=1)                       | 12<br>(n=1)               | -                               | -                                 |

“-” no data; mean ± SD is presented where applicable; *I.ric* – *Ixodes ricinus*; *I.pers* – *Ixodes persulcatus*; Ov – start of the oviposition; LL – start of larvae hatching; superscript letters indicate statistically significant differences between groups according to Mann-Whitney test (p<0.05)

**Table S2.** The duration of feeding and molting of larvae and nymphs of *Ixodes ricinus*, *Ixodes persulcatus*, and their hybrids under laboratory conditions

| Species                                         | Phase | Feeding in March, April, May |                                                              | Feeding in June, July  |                                                 | Feeding in September   |                                                 | Feeding in October     |                                                 | Feeding in November    |                                                 | Feeding in December    |                                                 |
|-------------------------------------------------|-------|------------------------------|--------------------------------------------------------------|------------------------|-------------------------------------------------|------------------------|-------------------------------------------------|------------------------|-------------------------------------------------|------------------------|-------------------------------------------------|------------------------|-------------------------------------------------|
|                                                 |       | Feeding duration, days       | Days from engorgement till the start of molting <sup>#</sup> | Feeding duration, days | Days from engorgement till the start of molting | Feeding duration, days | Days from engorgement till the start of molting | Feeding duration, days | Days from engorgement till the start of molting | Feeding duration, days | Days from engorgement till the start of molting | Feeding duration, days | Days from engorgement till the start of molting |
| <i>I. pers</i>                                  | LL    | 3                            | 28.5±7.8 <sup>a</sup><br>(n=5)                               | 3                      | 42.3±8.5 <sup>a</sup><br>(n=6)                  | 3                      | 105.3±11.6 <sup>a,j,h</sup><br>(n=7)            | 3                      | 96.0±10.0 <sup>a</sup><br>(n=3)                 | -                      | -                                               | -                      | -                                               |
|                                                 | NN    | 3                            | 43.3±0.5 <sup>b</sup><br>(n=8)                               | 3                      | 32.8±1.5 <sup>b</sup><br>(n=7)                  | 3                      | 42.8±9.9 <sup>b</sup><br>(n=5)                  | 3                      | 83.7±5.8 <sup>b,l</sup><br>(n=4)                | 3                      | 94.5±0.7 <sup>b</sup><br>(n=2)                  | 3                      | 75.0±1.4 <sup>b</sup><br>(n=2)                  |
| <i>I. ric</i>                                   | LL    | 2                            | 31.0±2.8<br>(n=5)                                            | 2                      | 44.5±2.1<br>(n=2)                               | 2                      | 48.0±13.6 <sup>j,i</sup><br>(n=5)               | 2                      | 44.5±2.1<br>(n=2)                               | -                      | -                                               | -                      | -                                               |
|                                                 | NN    | 2.7±0.5                      | 44.5±1.0 <sup>c</sup><br>(n=9)                               | 3                      | 37.3±4.5 <sup>c</sup><br>(n=6)                  | 3                      | 34.0±6.3 <sup>g</sup><br>(n=5)                  | 2.8±0.4                | 38.2±6.6 <sup>d,l</sup><br>(n=6)                | 3                      | 95.0±5.4 <sup>d</sup><br>(n=10)                 | 3                      | 72.0±2.8 <sup>d</sup><br>(n=4)                  |
| Hybrid<br>(♀ <i>I. ric</i> × ♂ <i>I. pers</i> ) | LL    | 2                            | 31.2±0.4 <sup>e</sup><br>(n=5)                               | 2                      | 39.7±4.6 <sup>e</sup><br>(n=3)                  | 2                      | 47.5±10.3 <sup>e,h,k</sup><br>(n=6)             | 3                      | 51.0±1.4 <sup>e</sup><br>(n=2)                  | -                      | -                                               | -                      | -                                               |
|                                                 | NN    | 3                            | 27.5±2.1<br>(n=2)                                            | 3                      | 47.0±2.8<br>(n=2)                               | 3                      | 57.0±1.4<br>(n=2)                               | -                      | -                                               | -                      | -                                               | -                      | -                                               |
| Hybrid<br>(♀ <i>I. pers</i> × ♂ <i>I. ric</i> ) | LL    | 2.7±0.6                      | 37.0±1.4<br>(n=2)                                            | 2.3±0.6                | 42.7±9.8<br>(n=3)                               | 2.3±0.6                | 100.7±17.9 <sup>i,k</sup><br>(n=3)              | -                      | -                                               | -                      | -                                               | -                      | -                                               |
|                                                 | NN    | 3                            | 44.5±3.5 <sup>f</sup><br>(n=2)                               | 3                      | 53.0±5.7 <sup>f</sup><br>(n=2)                  | 3                      | 72.7±19.6 <sup>f,g</sup><br>(n=6)               | 3                      | 61.5±9.1 <sup>l</sup><br>(n=8)                  | -                      | -                                               | -                      | -                                               |

“-” no data; *I. ric* – *Ixodes ricinus*; *I. pers* – *Ixodes persulcatus*; mean ± SD is presented where applicable; <sup>#</sup> the beginning of molting was recorded for a group of ticks – about 100 larvae or 10-15 nymphs; superscript letters indicate statistically significant differences between groups according to Mann-Whitney U-test (2 groups) or Kruskal-Wallis H-test (3 and more groups) (p<0.05)

**Table S3.** The beginning of molting\* of proto-female and proto-male nymphs of *Ixodes ricinus*, *Ixodes persulcatus*, and their hybrids under laboratory conditions

| Species                                       | Feeding in March,<br>April, May |                   | Feeding in June, July |             | Feeding in September |                   | Feeding in October |                   | Feeding in November |                   |
|-----------------------------------------------|---------------------------------|-------------------|-----------------------|-------------|----------------------|-------------------|--------------------|-------------------|---------------------|-------------------|
|                                               | Females                         | Males             | Females               | Males       | Females              | Males             | Females            | Males             | Females             | Males             |
| <i>I. persulcatus</i>                         | 41.5±2.4<br>(n=4)               | 38.8±4.9<br>(n=4) | 33.5±2.1<br>(n=2)     | 32<br>(n=2) | 38±4.2<br>(n=2)      | 39<br>(n=2)       | 87<br>(n=1)        | 87<br>(n=1)       | 95<br>(n=1)         | 94<br>(n=1)       |
| <i>I. ricinus</i>                             | 44.7±0.6<br>(n=3)               | 44.3±1.5<br>(n=3) | 38±4.2<br>(n=2)       | 32<br>(n=1) | 39<br>(n=1)          | 36<br>(n=1)       | 39.3±6.0<br>(n=3)  | 37.0±8.2<br>(n=3) | 97.0±7.0<br>(n=3)   | 95.0±7.0<br>(n=3) |
| Hybrid<br>(♀ <i>I.pers</i> × ♂ <i>I.ric</i> ) | -                               | -                 | -                     | -           | 82.7±25.6<br>(n=3)   | 62.7±2.1<br>(n=3) | 65.3±8.1<br>(n=4)  | 57.8±9.5<br>(n=4) | -                   | -                 |

“-” no data; mean ± SD is presented where applicable; \* the beginning of molting was recorded for a group of ticks – about 100 larvae or 10-15 nymphs
